# Supplementary material for: Mannans and endo-β-mannanases (MAN) in Brachypodium distachyon: expression profiling and possible role of the BdMAN genes during coleorhiza-limited seed germination
Source: PubMed Central journal article supplement (PMC4473977; doi:10.1093/jxb/erv168), 2015-04-28
Supplement: supp_erv168_jexbot145110_file001.pdf [file supp_erv168_jexbot145110_file001.pdf]

**Mannans and endo- $\beta$ -mannanases (MAN) in *Brachypodium distachyon*:  
Expression profiling and possible role of the *BdMAN* genes during  
coleorhiza-limited seed germination**

Virginia González-Calle, Cristina Barrero-Sicilia<sup>1</sup>, Pilar Carbonero, Raquel Iglesias-Fernández\*

Centro de Biotecnología y Genómica de Plantas (UPM-INIA), and E.T.S.I. Agrónomos, Campus de Montegancedo, Universidad Politécnica de Madrid, Pozuelo de Alarcón, 28223-Madrid, Spain

**Supplementary data:**

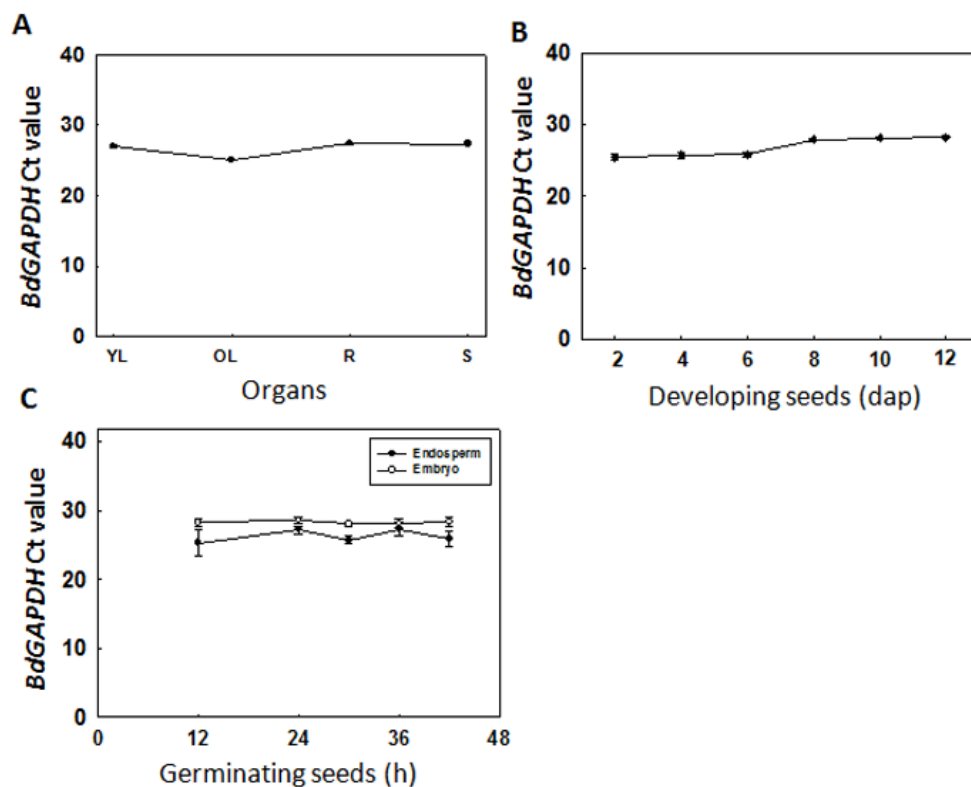

**Supplementary Fig. S1.** Transcription levels of the housekeeping (*BdGAPDH* gene), presented as Ct mean values, in different organs (OL: Old Leaves; R: Roots; S: Spikes; YL: Young Leaves; **A**), in developing seeds (dap: days after pollination; **B**) and during seed germination (from 12 to 42 h; **C**) of *B. distachyon*.

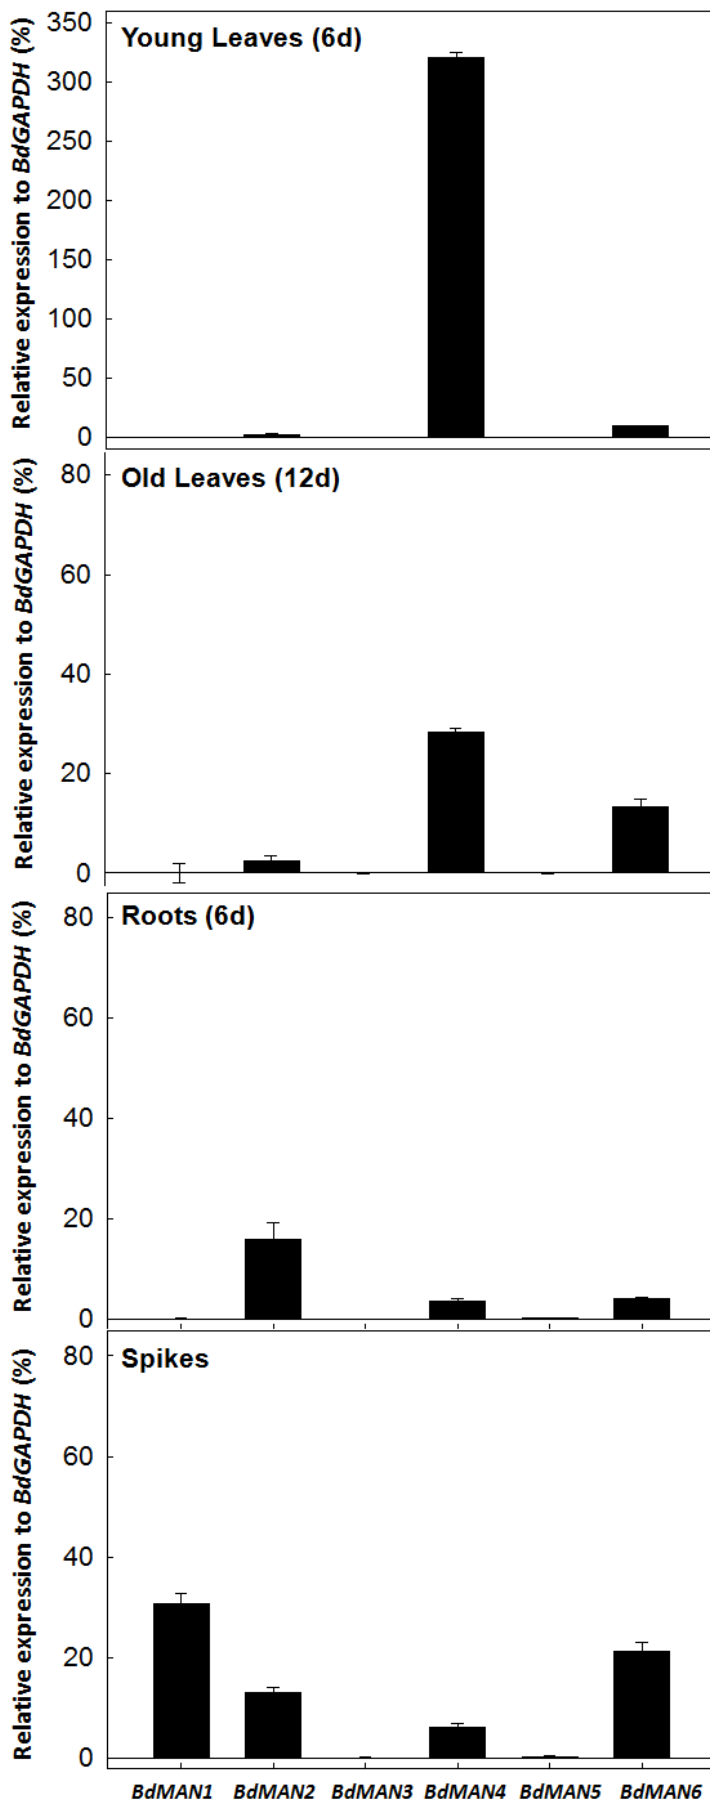

**Supplementary Fig.**

**S2.**

Transcripts analysis by RTqPCR of the *BdMAN1-6* genes in different organs. Young leaves (6 d); Old leaves (12 d); Roots (6 d) and Spikes. Data are means  $\pm$  standard error (SE) of three technical replicates of three biological samples.

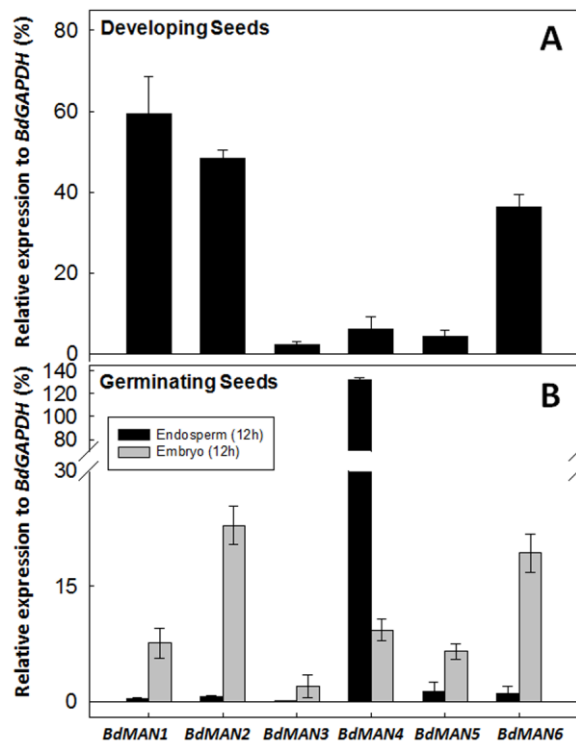

**Supplementary Fig. S3.** Expression analysis by RT-qPCR of *BdMAN1-6* genes in developing seeds (mix of different stages; **A**) and germinating seeds (12 h of imbibition; **B**). Embryos and de-embryonated seeds (endosperm) were separately analysed of *Brachypodium distachyon*. Data are means  $\pm$  standard error (SE) of three technical replicates of three biological samples.

**Table S1.** Major biochemical characteristics of *Brachypodium distachyon* and *Oryza sativa* endo- $\beta$ -mannanase proteins. SL: Sub-cellular localization

| Protein name  | Locus          | Protein size (Aa) | pI   | Mw(Da)   | Signal peptide position | SL prediction               |
|---------------|----------------|-------------------|------|----------|-------------------------|-----------------------------|
| <b>BdMAN1</b> | Bd2g45790      | 417               | 8.60 | 51765.15 | Cleavage site 21-22     | Secretory pathway (P=0.78)  |
| <b>BdMAN2</b> | Bd2g49682      | 446               | 6.24 | 49945.77 | No                      | Secretory pathway (P=0.92)  |
| <b>BdMAN3</b> | Bd3g57290      | 413               | 6.84 | 45112.05 | Cleavage site 30-31     | Secretory pathway (P=0.88)  |
| <b>BdMAN4</b> | Bd1g32107      | 468               | 5.67 | 51765.15 | Cleavage site 20-21     | Secretory pathway (P=0.85)  |
| <b>BdMAN5</b> | Bd4g44340      | 389               | 4.44 | 43266.27 | No                      | Other (P=0.91)              |
| <b>BdMAN6</b> | Bd1g42770      | 436               | 8.75 | 49158.23 | No                      |                             |
| <b>OsMAN1</b> | Os01g0663300.1 | 432               | 9.27 | 46874.91 | Cleavage site 30-31     | Secretory pathway (P= 0.96) |
| <b>OsMAN2</b> | Os01g0746700.1 | 445               | 5.79 | 50062.80 | No                      | Secretory pathway (P= 0.90) |
| <b>OsMAN3</b> | Os03g0828300.1 | 468               | 6.02 | 51216.68 | Cleavage site 23-24     | Secretory pathway (P= 0.97) |
| <b>OsMAN4</b> | Os03g0828500.1 | 461               | 5.38 | 50739.43 | No                      | -----                       |
| <b>OsMAN5</b> | Os05g0319100.1 | 491               | 5.60 | 53465.08 | No                      | Secretory pathway (P=0.70)  |
| <b>OsMAN6</b> | Os06g0311600.1 | 440               | 8.12 | 49455.08 | No                      | Secretory pathway (P=0.96)  |
| <b>OsMAN7</b> | Os11g0118200.1 | 379               | 4.95 | 42984.55 | No                      | -----                       |
| <b>OsMAN8</b> | Os12g0117300.1 | 372               | 4.85 | 41839.18 | No                      | Secretory pathway (P=0.96)  |

**Table S2.** Oligonucleotide sequences, amplicon length and PCR efficiency of primers used for RT-qPCR analyses.

| Gene           | Primer sense          | Primer antisense        | Amplicon size (bp) | T <sub>m</sub> (°C) | Slope | E*   |
|----------------|-----------------------|-------------------------|--------------------|---------------------|-------|------|
| <i>BdGAPDH</i> | CTCCCGCTATTTGTTTTGTC  | TGAAGATGTTGGAGCTGACG    | 76                 | 71.5                | -3.07 | 2.11 |
| <i>BdMAN1</i>  | TATTCATCCGGGAGAGAAGG  | ATTGGCATCTCCTGATCCAC    | 104                | 71.2                | -3.36 | 1.98 |
| <i>BdMAN2</i>  | GGTGTACGACATCGCCTACG  | GAGAAGCCGTCGTGGTAGTC    | 108                | 83.3                | -4.22 | 1.73 |
| <i>BdMAN3</i>  | TGTATGACGCGATCTACGC   | ATCACCTGCCAGAACATTCC    | 70                 | 77.2                | -3.64 | 1.88 |
| <i>BdMAN4</i>  | TAGGTTCAGTTTCAGGTTG   | ACACTTGCACTGCACAT       | 120                | 70.3                | -3.09 | 2.10 |
| <i>BdMAN5</i>  | CCAAGATCCAATCGTGAAATG | CTCACAGAAGCATAAGACCCAAC | 86                 | 65.9                | -3.16 | 2.07 |
| <i>BdMAN6</i>  | GCTCATCAAAGTTGCCTGTG  | TTACCGGCGCAACTAGAAAG    | 106                | 71.7                | -3.40 | 1.96 |

\*E=efficiency=10<sup>(-1/slope)</sup>

**Table S3.** Primers used for the synthesis of the *in situ* mRNA hybridization probes

| <b>Primer name</b>      | <b>Sequence 5'-3'</b>  |
|-------------------------|------------------------|
| <i>BdMAN2-insitu-s</i>  | CTCTCTCAAGCCGAAGCACC   |
| <i>BdMAN2-insitu-as</i> | CGTAGGCGATGTCGTACACC   |
| <i>BdMAN4-insitu-s</i>  | CTGCCGACTCGTTTCGTCTC   |
| <i>BdMAN4-insitu-as</i> | GACCAATCATCCTGACCGAC   |
| <i>BdMAN6-insitu-s</i>  | GCAAATAAAGCCCAAACACTAC |
| <i>BdMAN6-insitu-as</i> | GTCCGCCAAGTTTATACAAC   |

*s*, sense; *as*, antisense
